# Supplementary material for: Influence of residual sodium ions on the structure and properties of poly(3,4-ethylenedioxythiophene):poly(styrenesulfonate)
Source: Royal Society of Chemistry journal article supplement (doi:10.1039/c8ra05150j), 2018-01-01
Supplement: c8ra05150j1.pdf [file c8ra05150j1.pdf]

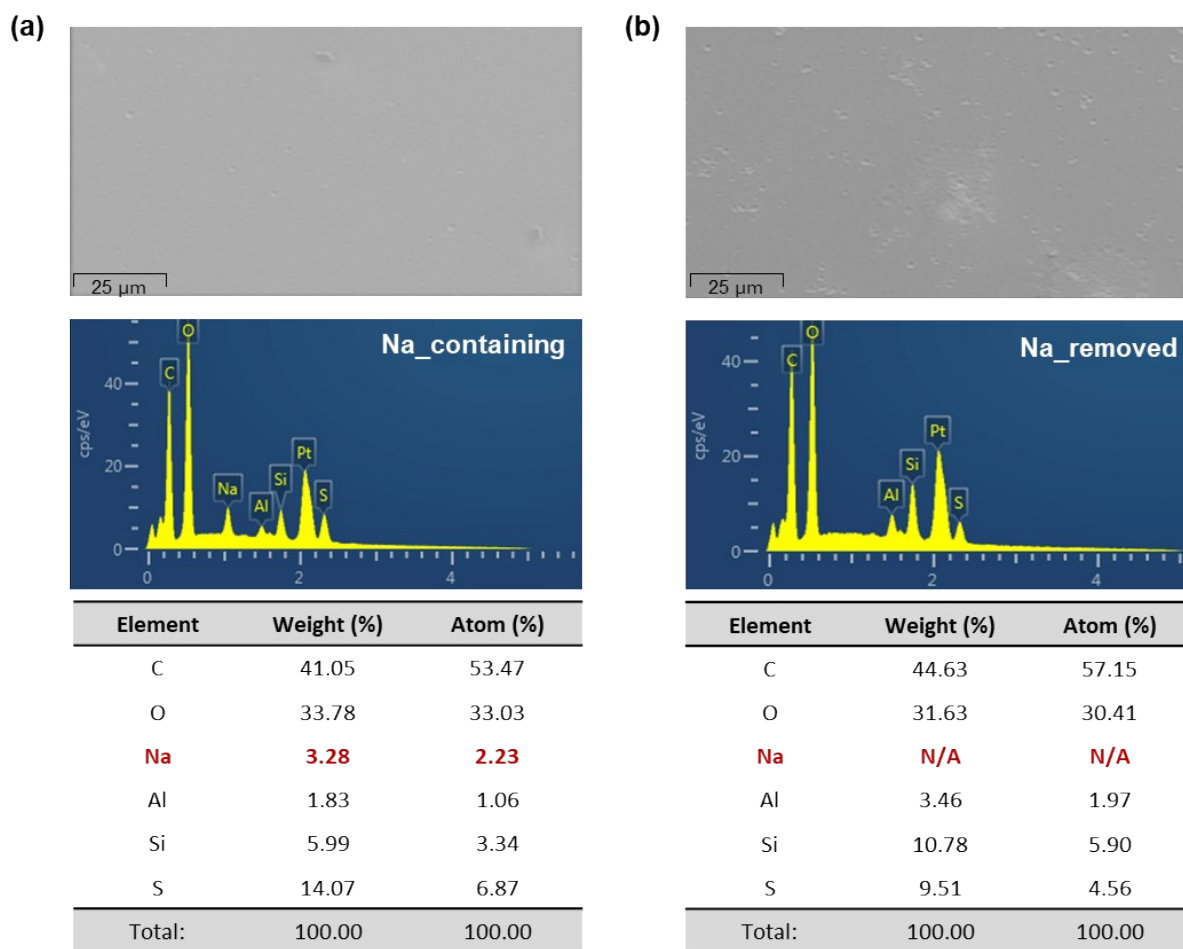

**Figure S1.** SEM-EDS analysis results of (a) sodium-containing and (b) sodium-removed PEDOT:PSS films on a glass substrate.

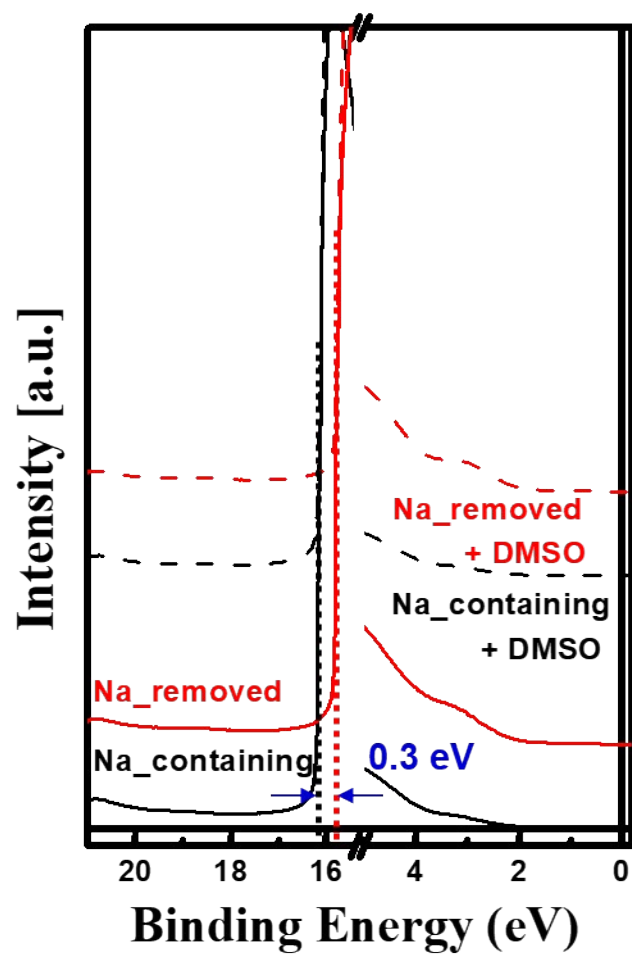

Figure S2. UPS spectra of PEDOT:PSS films on ITO.
